# Supplementary material
Source: HighWire-hosted journal article supplement (https://bmjopen.bmj.com/content/15/6/e094924)
Supplement: inline-supplementary-material-5 [file inline-supplementary-material-5.pdf]

Bedside Worksheet

Record ID

Bed Number (#)

MRN

Date & Time Bedside Measurements Collected

Location of pulse oximeter

☐ Finger

☐ Forehead

☐ Ear

☐ Other (describe)

Describe other location of pulse oximeter

Is the pulse oximeter properly placed with standard waveform?

☐ Yes

☐ No

If no, please explain

Is patient wearing artificial nails or nail polish?

☐ Yes

☐ No

What color are patient's nails?

☐ Red

☐ Purple

☐ Pink

☐ Black

☐ Green

☐ Blue

☐ Clear

☐ White

☐ Multi-colored

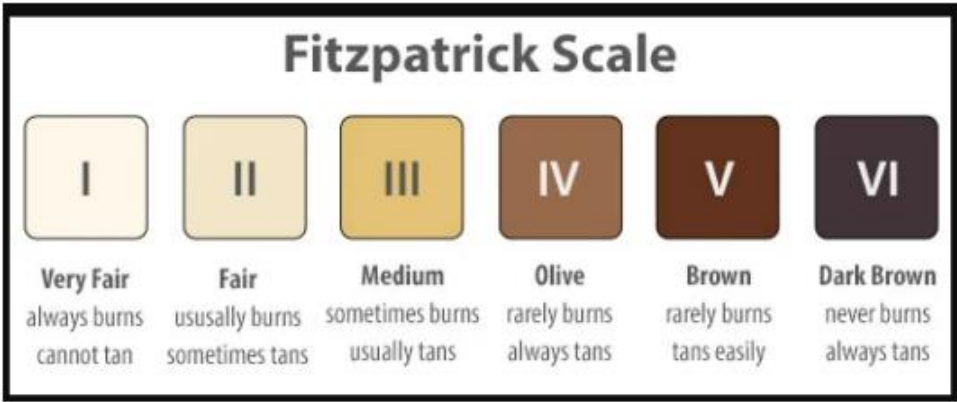

Using the Fitzpatrick Scale above, please select the skin color that most accurately reflects the patient's skin tone

☐ Very Fair   ☐ Fair   ☐ Medium   ☐ Olive   ☐ Brown   ☐ Dark Brown

Monk Scale

**How to use:** This scale is intended to be used to classify human skin color. Human skin color is immensely variable and complex, but scales, such as this one, are often used as a pragmatic and cost-effective means of approximately measuring common differences in skin color among human beings. For some use-cases, printing the scale may be necessary. Print this page using color accurate printing. Once printed, find the most appropriate match between an orb and/or swatch and the desired site (e.g., face, back of hand, etc). Holding the card near the site may help accomplish this. For instance, depending on your use-case, consider using a hole punch to punch a hole in the center of each orb and/or the center of each rectangle: Hold the printed card over the skin at the site you wish to describe. Move the card to find the color that matched most closely and note the category letter (e.g. 'E'). The orbs or squares may be used and you should note in your methods which you have chosen. As you may notice, the orbs have more shades per category, which better resemble human skin and may aid in finding the closest match.

Suggested citation: Monk, Ellis. 2019. "Monk Skin Tone Scale." Google <https://skintone.google>

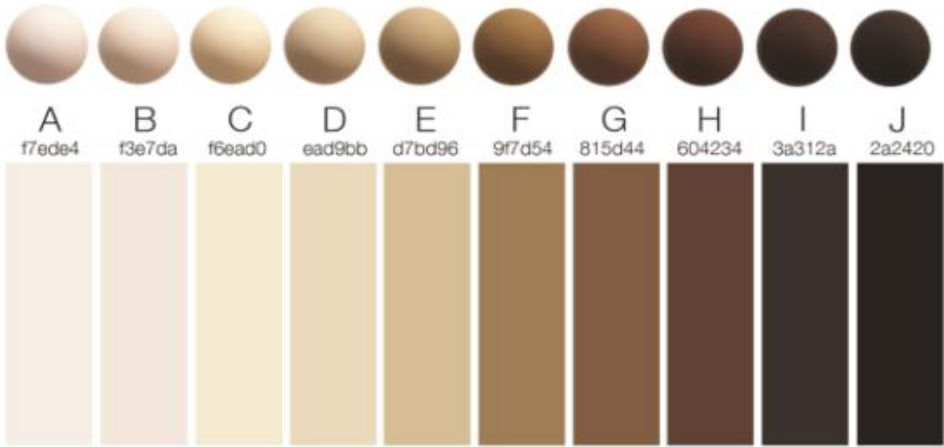

Using the Monk Scale above, please select the skin color that most accurately reflects the patient's skin tone

☐ A   ☐ B   ☐ C   ☐ D   ☐ E   ☐ F   ☐ G   ☐ H   ☐ I   ☐ J
